# Supplementary material for: Bone turnover in lactating and nonlactating women
Source: PubMed Central journal article supplement (PMC10579129; doi:10.1007/s00404-023-07189-0), 2023-09-14

## Supplemental material: Suppl. Figure 1b

Article title: Bone turnover in lactating and nonlactating women

Journal: Archives of Gynaecology and Obstetrics

Authors: Lena Nerius<sup>1</sup>, Mandy Vogel, Uta Ceglarek, Wieland Kiess, Ronald Biemann,  
Holger Stepan, Jürgen Kratzsch

<sup>1</sup>Corresponding author; LIFE Leipzig Research Center for Civilization Diseases, University of Leipzig, 04103 Leipzig, Germany; E-Mail: [lena-nerius@web.de](mailto:lena-nerius@web.de)

# 6 months

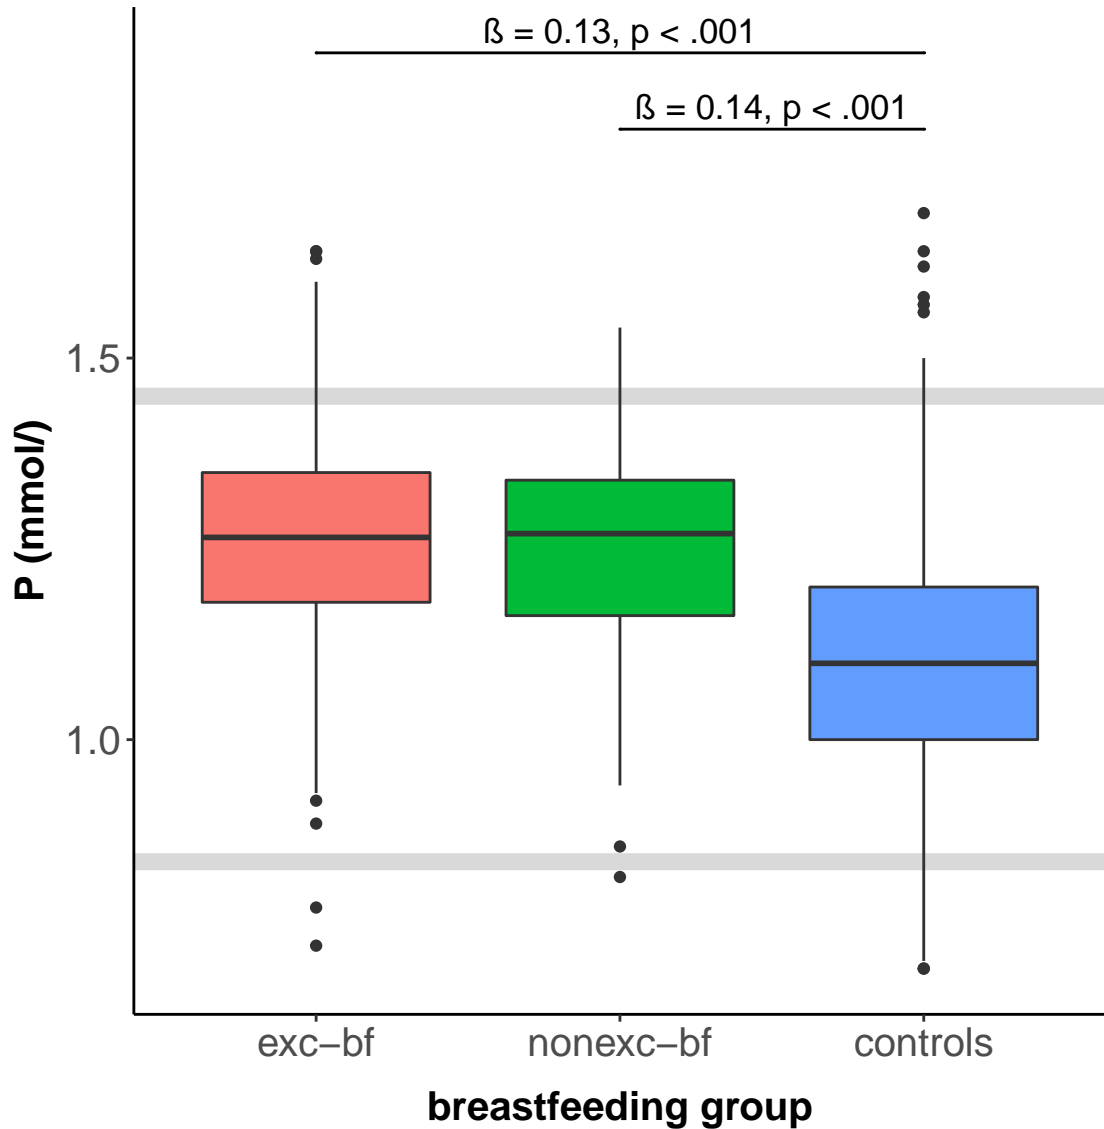

Supplement: 404_2023_7189_MOESM2_ESM.pdf [file 404_2023_7189_MOESM2_ESM.pdf]
