# Supplementary material for: Bone turnover in lactating and nonlactating women
Source: PubMed Central journal article supplement (PMC10579129; doi:10.1007/s00404-023-07189-0), 2023-09-14
Supplement: 404_2023_7189_MOESM3_ESM.pdf [file 404_2023_7189_MOESM3_ESM.pdf]

## Supplemental material: Suppl. Table 1

Article title: Bone turnover in lactating and nonlactating women

Journal: Archives of Gynaecology and Obstetrics

Authors: Lena Nerius<sup>1</sup>, Mandy Vogel, Uta Ceglarek, Wieland Kiess, Ronald Biemann,  
Holger Stepan, Jürgen Kratzsch

<sup>1</sup>Corresponding author; LIFE Leipzig Research Center for Civilization Diseases, University of Leipzig, 04103 Leipzig, Germany; E-Mail: [lena-nerius@web.de](mailto:lena-nerius@web.de)

|                  | <b>N lactation cohort</b> |                  |  |               |                  |  | <b>N control cohort</b> |
|------------------|---------------------------|------------------|--|---------------|------------------|--|-------------------------|
|                  | <b>3m</b>                 |                  |  | <b>6m</b>     |                  |  |                         |
|                  | <b>exc-bf</b>             | <b>nonexc-bf</b> |  | <b>exc-bf</b> | <b>nonexc-bf</b> |  |                         |
| <b>PTH</b>       | 542                       | 43               |  | 348           | 224              |  | 626                     |
| <b>Estradiol</b> | 324                       | 21               |  | 212           | 127              |  | 126                     |
| <b>βCTX</b>      | 540                       | 43               |  | 364           | 222              |  | 624                     |
| <b>P1NP</b>      | 538                       | 43               |  | 346           | 223              |  | 624                     |
| <b>OC</b>        | 541                       | 43               |  | 347           | 223              |  | 624                     |
| <b>Ca</b>        | 571                       | 48               |  | 360           | 232              |  | 725                     |
| <b>P</b>         | 571                       | 48               |  | 360           | 232              |  | 725                     |
