# Supplementary material for: Bone turnover in lactating and nonlactating women
Source: PubMed Central journal article supplement (PMC10579129; doi:10.1007/s00404-023-07189-0), 2023-09-14
Supplement: 404_2023_7189_MOESM4_ESM.pdf [file 404_2023_7189_MOESM4_ESM.pdf]

## Supplemental material: Suppl. Table 2

Article title: Bone turnover in lactating and nonlactating women

Journal: Archives of Gynaecology and Obstetrics

Authors: Lena Nerius<sup>1</sup>, Mandy Vogel, Uta Ceglarek, Wieland Kiess, Ronald Biemann,  
Holger Stepan, Jürgen Kratzsch

<sup>1</sup>Corresponding author; LIFE Leipzig Research Center for Civilization Diseases, University of Leipzig, 04103 Leipzig, Germany; E-Mail: [lena-nerius@web.de](mailto:lena-nerius@web.de)

|                     |           | 3 m         | 6 m         |
|---------------------|-----------|-------------|-------------|
| PTH (pmol/l)        | exc-bf    | 3.40 (1.51) | 4.01 (1.69) |
|                     | nonexc-bf | 3.81 (1.60) | 3.68 (1.38) |
|                     | controls  | 3.54 (1.19) |             |
| Estradiol (pmol/l)  | exc-bf    | 89.0 (118)  | 130 (352)   |
|                     | nonexc-bf | 135 (168)   | 118 (178)   |
|                     | controls  | 213 (263)   |             |
| $\beta$ CTX (pg/ml) | exc-bf    | 714 (276)   | 724 (283)   |
|                     | nonexc-bf | 637 (232)   | 655 (257)   |
|                     | controls  | 305 (122)   |             |
| P1NP (ng/ml)        | exc-bf    | 92.1 (33.2) | 99.0 (32.3) |
|                     | nonexc-bf | 91.3 (38.3) | 99.8 (34.9) |
|                     | controls  | 39.2 (15.8) |             |
| OC (ng/ml)          | exc-bf    | 36.5 (12.1) | 38.2 (12.4) |
|                     | nonexc-bf | 35.0 (9.98) | 37.0 (11.9) |
|                     | controls  | 17.6 (5.85) |             |
| Ca (mmol/l)         | exc-bf    | 2.41 (0.08) | 2.38 (0.07) |
|                     | nonexc-bf | 2.39 (0.09) | 2.39 (0.08) |
|                     | controls  | 2.35 (0.08) |             |
| P (mmol/l)          | exc-bf    | 1.32 (0.14) | 1.26 (0.13) |
|                     | nonexc-bf | 1.28 (0.16) | 1.25 (0.13) |
|                     | controls  | 1.10 (0.15) |             |
